# Supplementary material for: A Systematic Review of Persistent Symptoms and Residual Abnormal Functioning following Acute COVID-19: Ongoing Symptomatic Phase vs. Post-COVID-19 Syndrome
Source: MDPI journal article supplement (doi:10.3390/jcm10245913), 2021-12-16
Supplement: s1 [file s1]

## Supplementary Data 1. Search Strategy

### Embase

'coronavirus disease 2019'/exp  
((long OR 'long term' OR 'long lasting' OR Prolonged) NEAR/3 ('2019 ncov' OR ncover OR covid OR 'sars cov 2')):ti,ab  
(('long\* haul\*' OR longhaul\* OR 'long\* tail\*' OR longtail\* OR longduration\* OR 'long duration\*' OR longest\* OR 'long last\*') NEAR/3 ('2019 ncov' OR ncover OR covid OR 'sars cov 2')):ti,ab  
((chronic OR post-infect\* OR 'post acute' OR persistent) NEAR/6 ('2019 ncov' OR ncover OR covid OR 'sars cov 2')):ti,ab  
( 'post covid' OR postcovid OR 'Post acute covid\*' OR 'postacute covid\*'):ti,ab  
#1 OR #2 OR #3 OR #4 OR #5  
'hospital discharge'/exp  
((long OR 'long term' OR 'long lasting' OR post-acute OR post-covid OR Postdischarge OR Post-discharge OR chronic OR persist\* OR linger\*) NEAR/3 (effect\* OR symptom\* OR recover\* OR therapy OR sequelae OR complication\* OR consequence\* OR syndrome\* OR outcome\*)):ti,ab  
((prolong\* OR longer OR extended OR lengthy OR lengthen OR increase\* OR drawn-out OR protracted) NEAR/4 recover\*):ti,ab  
#7 OR #8 OR #9  
'fatigue'/de OR 'exhaustion'/de OR 'fatigue assessment scale'/exp OR 'fatigue assessment instrument'/exp OR 'postviral fatigue syndrome'/exp OR 'Fatigue Severity Scale'/exp OR 'Fatigue Impact Scale'/exp  
(fatigue\* OR tired\* OR exhaustion OR exhausted OR lethargy OR sluggish OR 'postviral syndrome' OR 'post viral syndrome' OR 'fatigue severity scale' OR 'myalgic encephalomyelitis'):ti,ab  
#11 OR #12  
#6 AND #10 AND #13

---

### MEDLINE

COVID-19/  
((long OR long term OR long lasting OR Prolonged) adj3 (2019 ncov OR ncover OR covid OR sars cov 2)).ti,ab.  
((long\* haul\* OR longhaul\* OR long\* tail\* OR longtail\* OR longduration\* OR long duration\* OR longest\* OR long last\*) adj3 (2019 ncov OR ncover OR covid OR sars cov 2)).ti,ab.  
((chronic OR post infect\* OR post acute OR persistent) adj6 (2019 ncov OR ncover OR covid OR sars cov 2)).ti,ab.  
(post covid OR postcovid OR Post acute covid\* OR postacute covid\*).ti,ab.  
or/1-5  
Patient Discharge/  
((long OR long term OR long lasting OR post acute OR post covid OR Postdischarge OR Post discharge OR chronic OR persist\* OR linger\*) adj3 (effect\* OR symptom\* OR recover\* OR therapy OR sequelae OR complication\* OR consequence\* OR syndrome\* OR outcome\*)).ti,ab.  
((prolong\* OR longer OR extended OR lengthy OR lengthen OR increase\* OR drawn out OR protracted) adj4 recover\*).ti,ab.  
or/7-9  
Fatigue/ OR Fatigue Syndrome, Chronic/ OR Muscle Weakness/  
(fatigue assessment scale OR fatigue assessment instrument OR Fatigue Severity Scale OR Fatigue Impact Scale).ti,ab.  
(fatigue\* OR tired\* OR exhaustion OR exhausted OR lethargy OR sluggish OR postviral syndrome OR post viral syndrome OR fatigue severity scale OR myalgic encephalomyelitis).ti,ab.  
or/11-13  
6 AND 10 AND 14

---

---

### Coronavirus Research Database (ProQuest)

TI ((long OR "long term" OR "long lasting" OR Prolonged) N2 ("2019 ncov" OR ncov OR covid OR "sars cov 2")) OR AB ((long OR "long term" OR "long lasting" OR Prolonged) N3 ("2019 ncov" OR ncov OR covid OR "sars cov 2"))

TI (("long\* haul\*" OR longhaul\* OR "long\* tail\*" OR longtail\* OR longduration\* OR "long duration\*" OR longlast\* OR "long last\*") N2 ("2019 ncov" OR ncov OR covid OR "sars cov 2")) OR AB (("long\* haul\*" OR longhaul\* OR "long\* tail\*" OR longtail\* OR longduration\* OR "long duration\*" OR longlast\* OR "long last\*") N2 ("2019 ncov" OR ncov OR covid OR "sars cov 2"))

TI ((chronic OR post-infect\* OR "post acute" OR persistent) N5 ("2019 ncov" OR ncov OR covid OR "sars cov 2")) OR AB ((chronic OR post-infect\* OR "post acute" OR persistent) N5 ("2019 ncov" OR ncov OR covid OR "sars cov 2"))

TI ("post covid" OR postcovid OR "Post acute covid\*" OR "postacute covid\*") OR AB ("post covid" OR postcovid OR "Post acute covid\*" OR "postacute covid\*")

1 OR 2 OR 3 OR 4

TI ("fatigue assessment scale" OR "fatigue assessment instrument" OR "postviral fatigue syndrome" OR "Fatigue Severity Scale" OR "Fatigue Impact Scale") OR AB ("fatigue assessment scale" OR "fatigue assessment instrument" OR "postviral fatigue syndrome" OR "Fatigue Severity Scale" OR "Fatigue Impact Scale")

TI (fatigue\* OR tired\* OR exhaustion OR exhausted OR lethargy OR sluggish OR "postviral syndrome" OR "post viral syndrome" OR "fatigue severity scale" OR "myalgic encephalomyelitis") OR AB (fatigue\* OR tired\* OR exhaustion OR exhausted OR lethargy OR sluggish OR "postviral syndrome" OR "post viral syndrome" OR "fatigue severity scale" OR "myalgic encephalomyelitis")

6 OR 7

S5 AND S8

---

### Google Scholar

2019nCoV|"2019 nCoV|CoV|coronavirus"|"2019 novel|new coronavirus|cov"|"wuhan coronavirus|cov|ncov|outbreak"|"wuhan\*coronavirus|cov|ncov|outbreak"|"wuhan\*\*coronavirus|cov|ncov|outbreak"|"coronavirus|cov|ncov\*wuhan" fatigue|exhaustion

---

### LitCovid

("long term"[tiab] OR "long lasting"[tiab] OR Prolonged[tiab] OR chronic[tiab] OR post-infect\*[tiab] OR "post acute"[tiab]) AND (fatigue\*[tiab] OR tired\*[tiab] OR exhaustion[tiab] OR exhausted[tiab] OR lethargy[tiab] OR "postviral syndrome"[tiab] OR "post viral syndrome"[tiab] OR "myalgic encephalomyelitis"[tiab])

## Supplementary Data 2. Data extraction tool

| First Author       | Date   | Country of Authorship | Primary Topic   | Specific Topic(s)                                                                                | Study Design (re. long COVID) | N     | Age (Years)                          | Gender (% Female) | Eligibility Criteria*                                                       | COVID Hospital Status                | Time Post-COVID (from recovery/onset)                                         | Weeks from COVID Onset                    | Fatigue Measurement Tool (FMT)*                     | Method of FMT Administration            |
|--------------------|--------|-----------------------|-----------------|--------------------------------------------------------------------------------------------------|-------------------------------|-------|--------------------------------------|-------------------|-----------------------------------------------------------------------------|--------------------------------------|-------------------------------------------------------------------------------|-------------------------------------------|-----------------------------------------------------|-----------------------------------------|
| Arnold             | Apr-21 | United Kingdom        | Symptomatology  | 1) Symptomatology; 2) Respiratory functioning; 3) Quality of life; 4) Haematology                | Cross-Sectional               | 110   | M = 60<br>IQR = 46-73                | 38%               | -                                                                           | Inpatient                            | M = 83 days<br>IQR = 74-88<br>All ~ 4 months                                  | 16 weeks                                  | SF-36 GSQ                                           | Summed rating scale in-person           |
| Bellani            | Jan-21 | Italy                 | Respiratory     | 1) Respiratory functioning; 2) Symptomatology                                                    | Cross-Sectional               | 238   | M = 61<br>IQR = 50-71                | 40%               | -                                                                           | Inpatient (+ICU)                     |                                                                               | 21 weeks                                  | Novel GSQ                                           | Binary scale (Y/N) via phone            |
| Carli              | Jul-20 | Italy                 | Symptomatology  | 1) Symptomatology                                                                                | Short Study                   | 143   | $\bar{X}$ = 56.5<br>SD = 14.6        | 37%               | -                                                                           | Inpatient (+ICU)                     | $\bar{X}$ = 36.1 days<br>SD = 12.9                                            | 9 weeks                                   | Novel GSQ                                           | Binary scale (Y/N) in-person            |
| Carvalho-Schneider | Oct-20 | France                | Symptomatology  | 1) Symptomatology                                                                                | Longitudinal                  | 150   | $\bar{X}$ = 49.0<br>SD = 15.0        | 56%               | Excl: ICU or residential care                                               | Mixed (-ICU)                         | T1: $\bar{X}$ = 32.7 days, SD = 2.5*<br>T11: $\bar{X}$ = 59.7 days, SD = 1.7* | 5 weeks   9 weeks                         | -                                                   | -                                       |
| Cheng              | Jan-21 | United Kingdom        | Symptomatology  | 1) Symptomatology; 2) Respiratory functioning                                                    | Cross-Sectional               | 113   | M = 73<br>IQR = 57-84                | 44%               | -                                                                           | Inpatient (+ICU)                     |                                                                               | 13 weeks                                  | Novel GSQ                                           | Binary scale (Y/N) in-person            |
| Chopra             | Nov-20 | USA                   | Symptomatology  | 1) Symptomatology                                                                                | Short Study                   | 488   | M = 62<br>IQR = 50-72                | 48%               | -                                                                           | Inpatient (+ICU)                     | All ~ 60 days                                                                 | 13 weeks                                  | -                                                   | -                                       |
| Cortés-Telles      | Jun-20 | Mexico                | Symptomatology  | 1) Symptomatology; 2) Respiratory functioning                                                    | Cross-Sectional               | 186   | $\bar{X}$ = 47.0<br>SD = 13.0        | 39%               | Excl: Critical cases                                                        | Mixed                                | $\bar{X}$ = 59.5 days*<br>SD = 13.5                                           | 9 weeks                                   | Novel GSQ                                           | Binary scale (Y/N) in-person            |
| Daher              | Oct-20 | Germany               | Respiratory     | 1) Symptomatology; 2) Respiratory functioning; 3) Cognitive/Psych func.; 4) Inflamm. response    | Cross-Sectional               | 33    | $\bar{X}$ = 64.0<br>SD = 3.0         | 33%               | Incl: Severe COVID diagnosis<br>Excl: ARDS diagnosis & ICU                  | Inpatient                            | M = 56 days<br>IQR = 48-71                                                    | 12 weeks                                  | Novel GSQ                                           | Binary scale (Y/N) in-person            |
| D'Cruz             | Jan-21 | United Kingdom        | Symptomatology  | 1) Symptomatology; 2) Respiratory functioning                                                    | Cross-Sectional               | 119   | $\bar{X}$ = 58.7<br>SD = 14.4        | 38%               | -                                                                           | Inpatient (+ICU)                     | M = 61 days<br>IQR = 51-67                                                    | 13 weeks                                  | Novel GSQ                                           | Binary scale (Y/N) in-person            |
| De Lorenzo         | Oct-20 | Italy                 | Symptomatology  | 1) Symptomatology                                                                                | Cross-Sectional               | 185   | M = 57<br>IQR = 48-67                | 34%               | -                                                                           | Mixed                                | M = 23 days<br>IQR = 20-29                                                    | 7 weeks                                   | -                                                   | -                                       |
| Froidure           | Apr-21 | Belgium               | Respiratory     | 1) Respiratory functioning; 2) Symptomatology                                                    | Cross-Sectional               | 134   | M = 60<br>IQR = 53-68                | 41%               | Excl: Follow-ups 60<x<120 days                                              | Inpatient (+ICU)                     | M = 95 days<br>IQR = 86-107                                                   | 18 weeks                                  | Novel GSQ                                           | Binary scale (Y/N) in-person            |
| Garrigues          | Aug-20 | France                | Symptomatology  | 1) Symptomatology                                                                                | Short Study                   | 120   | $\bar{X}$ = 63.2<br>SD = 15.7        | 37%               | -                                                                           | Multiple Cohorts:<br>Inpatient   ICU | $\bar{X}$ = 110.9 days*<br>SD = 11.1                                          | 16 weeks                                  | Novel GSQ                                           | Binary scale (Y/N) via phone            |
| Halpin             | Feb-21 | United Kingdom        | Symptomatology  | 1) Symptomatology; 2) Rehabilitation needs; 3) Psych. wellbeing; 4) Quality of life; 5) Other    | Cross-Sectional               | 100   | M = 70.5 / 58.5<br>R = 20-93 / 34-84 | 46%               | Incl: Discharged<br>Excl: Comorbid neuro. condition                         | Multiple Cohorts:<br>Inpatient   ICU | $\bar{X}$ = 48.0 days<br>R = 29-71                                            | 11 weeks                                  | Novel GSQ                                           | Likert scale via phone                  |
| Huang (I)          | Jan-21 | China                 | Symptomatology  | 1) Symptomatology; 2) Respiratory functioning; 3) Quality of life; 4) Bloods                     | Cross-Sectional               | 1,733 | M = 57<br>IQR = 47-65                | 48%               | Excl: Comorbid psych. Condition; Re-admission; Immobility issues            | Inpatient (+ICU)                     | M = 153 days<br>IQR = 146-160                                                 | 26 weeks                                  | Novel GSQ                                           | Binary scale (Y/N) in-person            |
| Huang (II)         | Jun-20 | China                 | Respiratory     | 1) Respiratory functioning                                                                       | Cross-Sectional               | 57    | $\bar{X}$ = 46.7<br>SD = 13.8        | 54%               | Excl: Previous pulmonary resection, neurological disease, or mental illness | Inpatient                            | All ~ 30 days                                                                 | 8 weeks                                   | -                                                   | -                                       |
| Iqbal              | Feb-21 | Pakistan              | Symptomatology  | 1) Symptomatology                                                                                | Cross-Sectional               | 158   | $\bar{X}$ = 32.1<br>SD = 12.4        | 55%               | Excl: Psychiatric Illness                                                   | Mixed                                | $\bar{X}$ = 38.1 days<br>SD = 20.0                                            | 7 weeks                                   | Novel GSQ                                           | Binary scale (Y/N) via phone            |
| Jacobs             | Dec-20 | USA                   | Symptomatology  | 1) Symptomatology; 2) Quality of life                                                            | Longitudinal                  | 183   | M = 57<br>IQR = 48-68                | 38%               | Incl: Hospital for 3+ days<br>Excl: Dementia/Delirium                       | Inpatient                            | T1 = 0 days   T2 = 14 days   T11 = 21 days   T11 = 35 days (IQR=30-40)        | 4 weeks   6 weeks   7 weeks   9 weeks     | PROMIS GSQ                                          | Likert scale via phone/email            |
| Lerum              | Apr-21 | Norway                | Respiratory     | 1) Respiratory functioning                                                                       | Cross-Sectional               | 103   | M = 59<br>IQR = 49-72                | 48%               | -                                                                           | Multiple Cohorts:<br>Inpatient   ICU | M = 83 days*<br>IQR = 73-90                                                   | 12 weeks                                  | -                                                   | -                                       |
| Liang              | Oct-20 | China                 | Symptomatology  | 1) Symptomatology; 2) Respiratory functioning                                                    | Cross-Sectional               | 76    | M = 41.3<br>IQR = 13.8               | 72%               | Excl. Comorbid neuro. condition; Underwent pulmonary resection              | Inpatient (+ICU)                     | T1 = 1 month, T1 = 2 months, T11 = 3 months; SD = 1                           | 5 weeks   13 weeks   17 weeks             | Novel GSQ                                           | Binary scale (Y/N) in-person            |
| Loerinc            | Mar-21 | USA                   | Other           | 1) Transition of COVID care at discharge; 2) Symptomatology                                      | Cross-Sectional               | 310   | M = 58<br>Range = 23-99              | 51%               | -                                                                           | Inpatient (+ICU)                     | All = Discharge                                                               | 4 weeks                                   | Novel GSQ                                           | Obtained from physician discharge notes |
| Mandal             | Sep-20 | United Kingdom        | Symptomatology  | 1) Long COVID; 2) Respiratory functioning                                                        | Cross-Sectional               | 384   | $\bar{X}$ = 59.9<br>SD = 16.1        | 38%               | -                                                                           | Inpatient (+ICU)                     | M = 54 days<br>IQR = 47-59                                                    | 12 weeks                                  | Novel GSQ                                           | Likert scale via phone / in-person      |
| Miyazato           | Oct-20 | Japan                 | Symptomatology  | 1) Symptomatology                                                                                | Longitudinal                  | 63    | $\bar{X}$ = 48.1<br>SD = 18.5        | 33%               | -                                                                           | Inpatient                            | $\bar{X}$ = 108.0 days, SD = 23.0<br>(T1 ~ 60 days, T11 ~ 120 days)*          | 9 weeks   17 weeks                        | Novel GSQ                                           | Binary scale (Y/N) via phone            |
| Mo                 | Jun-20 | China                 | Respiratory     | 1) Respiratory functioning                                                                       | Short Study                   | 110   | $\bar{X}$ = 49.1<br>SD = 4.0         | 50%               | Excl: Critical cases                                                        | Inpatient                            | All = Discharge                                                               | 4 weeks                                   | -                                                   | -                                       |
| Moreno-Pérez       | Mar-21 | Spain                 | Symptomatology  | 1) Symptomatology; 2) Respiratory functioning                                                    | Cross-Sectional               | 277   | M = 62<br>IQR = 53-72                | 47%               | -                                                                           | Mixed                                | M = 77 days*<br>IQR = 71-85                                                   | 11 weeks                                  | Novel GSQ                                           | Binary scale (Y/N) in-person            |
| Osikomaya          | Mar-21 | Nigeria               | Symptomatology  | 1) Symptomatology                                                                                | Cross-Sectional               | 274   | $\bar{X}$ = 41.8<br>SD = 11.8        | 34%               | -                                                                           | Outpatient                           | M = 15 days<br>IQR = 14-17                                                    | 6 weeks                                   | Novel GSQ                                           | Binary scale (Y/N) in-person            |
| Prieto             | Mar-21 | Argentina             | Symptomatology  | 1) Symptomatology                                                                                | Cross-Sectional               | 85    | $\bar{X}$ = 43.0<br>SD = 13.0        | 45%               | -                                                                           | Mixed                                | M = 53 days*<br>IQR = 31-65                                                   | 8 weeks                                   | Novel GSQ                                           | Binary scale (Y/N) in-person            |
| Raman              | Nov-20 | United Kingdom        | Symptomatology  | 1) Symptomatology; 2) Neurological functioning; 3) Respiratory func.; 4) Psych. Wellbeing; Other | Cross-Sectional               | 58    | $\bar{X}$ = 55.4<br>SD = 13.2        | 41%               | Incl: Moderate-to-severe COVID                                              | Inpatient (+ICU)                     | M = 2.3 months*<br>IQR = 2.06-2.53                                            | 10 weeks                                  | Fatigue Severity Scale                              | Likert scale in-person                  |
| Rosales-Castillo   | Jan-21 | Spain                 | Symptomatology  | 1) Symptomatology; 2) Psychological wellbeing                                                    | Cross-Sectional               | 118   | $\bar{X}$ = 60.2<br>SD = 15.1        | 44%               | -                                                                           | Inpatient                            | $\bar{X}$ = 50.8 days<br>SD = 6.0                                             | 11 weeks                                  | Novel GSQ                                           | Binary scale (Y/N) in-person            |
| Shah               | Mar-21 | Canada                | Respiratory     | 1) Respiratory functioning; 2) Symptomatology                                                    | Cross-Sectional               | 60    | M = 67<br>IQR = 54-74                | 32%               | -                                                                           | Inpatient                            | $\bar{X}$ = 11.7 weeks*<br>SD = n/a                                           | 12 weeks                                  | -                                                   | -                                       |
| Simani             | Feb-21 | Iran                  | Symptomatology  | 1) Symptomatology; 2) Psychological wellbeing                                                    | Cross-Sectional               | 120   | $\bar{X}$ = 54.6<br>SD = 16.9        | 33%               | Excl: Previous life-threatening infection                                   | Inpatient (+ICU)                     | All ~ 6 months                                                                | 30 weeks                                  | Fukuda questionnaire                                | Likert scale via phone                  |
| Syles              | Apr-21 | United Kingdom        | Symptomatology  | 1) Symptomatology; 2) Haematology; 3) Respiratory functioning                                    | Cross-Sectional               | 134   | M = 58<br>R = 25-89                  | 34%               | Excl: Mild symptoms or frail                                                | Multiple Cohorts:<br>Inpatient   ICU | M = 113 days, R = 46-167<br>(T1~61, T11~88, T11~113, T11~147)                 | 13 weeks   17 weeks   20 weeks   25 weeks | Novel GSQ                                           | Binary scale (Y/N) in-person            |
| Taboada            | Dec-20 | Spain                 | Quality of Life | 1) Quality of life; 2) Symptomatology                                                            | Cross-Sectional               | 91    | $\bar{X}$ = 65.5<br>SD = 10.4        | 35%               | -                                                                           | ICU                                  | All ~ 6 months                                                                | 30 weeks                                  | -                                                   | -                                       |
| Townsend (I)       | Nov-20 | Ireland               | Symptomatology  | 1) Symptomatology; 2) Haematology                                                                | Cross-Sectional               | 128   | $\bar{X}$ = 49.5<br>SD = 15.0        | 54%               | Incl: 6+ weeks post-COVID                                                   | Mixed                                | M = 72 days<br>IQR = 62-87                                                    | 14 weeks                                  | Chalder Fatigue Scale (incl. Psych/Phys sub-scales) | Likert scale in-person                  |
| Venturelli         | Jan-21 | Italy                 | Respiratory     | 1) Symptomatology                                                                                | Cross-Sectional               | 767   | $\bar{X}$ = 63.0<br>SD = 13.6        | 33%               | -                                                                           | Inpatient (+ICU)                     | M = 105 days*<br>IQR = 94-127                                                 | 15 weeks                                  | Novel GSQ                                           | Binary scale (Y/N) in-person            |
| Walle-Hansen       | Mar-21 | Norway                | Quality of Life | 1) Quality of life                                                                               | Cross-Sectional               | 106   | $\bar{X}$ = 74.3<br>R = 60-96        | 43%               | -                                                                           | Inpatient (+ICU)                     | M = 186<br>IQR = n/a                                                          | 31 weeks                                  | -                                                   | -                                       |
| Wang               | May-20 | China                 | Symptomatology  | 1) Symptomatology; 2) Respiratory functioning; 3) Haematology                                    | Longitudinal                  | 131   | M = 49<br>IQR = 36-62                | 55%               | Incl: Objective improvements (incl. fever, chest CT, respiratory symptoms)  | Inpatient                            | T1 = 0 days, T11 = 7-14 days<br>T11 = 21-28 days                              | 4 weeks   6 weeks   8 weeks               | Novel GSQ                                           | Binary scale (Y/N) in-person            |
| Wong               | Nov-20 | Canada                | Symptomatology  | 1) Symptomatology                                                                                | Short Study                   | 78    | $\bar{X}$ = 62.0<br>SD = 16.0        | 36%               | -                                                                           | Inpatient                            | M = 13 weeks*<br>IQR = 11-14                                                  | 13 weeks                                  | -                                                   | -                                       |
| Xiong              | Sep-20 | China                 | Symptomatology  | 1) Symptomatology; 2) Psychological wellbeing                                                    | Cross-Sectional               | 538   | M = 52<br>IQR = 41-62                | 55%               | Incl: 3+ months post-COVID                                                  | Inpatient                            | M = 97 days<br>IQR = 95-102                                                   | 18 weeks                                  | Novel GSQ                                           | Binary scale (Y/N) via phone            |
| Yu                 | Mar-20 | China                 | Respiratory     | 1) Respiratory functioning                                                                       | Cross-Sectional               | 32    | M = 44.4<br>IQR = N/A                | 31%               | Incl: 3 chest CT scans (2-hospital; 1-post)                                 | Inpatient (+ICU)                     | M = 9 days<br>IQR = N/A                                                       | 5 weeks                                   | Novel GSQ                                           | Binary scale (Y/N) in-person            |

\*excl. COVID\* test result, age & hospital status

\* = from symptom onset or hospitalisation

[blank] = from hospital discharge or COVID recovery

\*From COVID onset\* = +28 days until "recovery"

Novel GSQ = Novel general symptom questionnaire
